# Supplementary material for: Self-doping enables flexible Ag 2 Se bulk materials for room-temperature thermoelectric generators and coolers
Source: Royal Society of Chemistry journal article supplement (doi:10.1039/d5ta10274j), 2026-01-01
Supplement: d5ta10274j1.pdf [file d5ta10274j1.pdf]

# Self-Doping Enables Flexible Ag<sub>2</sub>Se Bulks for Room-Temperature Thermoelectric Generators and Coolers

*I-Lun Jen<sup>a,b\*</sup>, Wan-Ting Chiu<sup>c,\*</sup>, Li-Yan Lee<sup>c</sup>, Kuang-Kuo Wang<sup>d</sup>, Masaki Tahara<sup>e</sup>, Hideki Hosoda<sup>e</sup>, and Hsin-Jay Wu<sup>a,f\*</sup>*

## Experimental details

### Synthesis of materials

A total of ten grams of high-purity elements of Ag (99.99%, Alfa Aesar) and Se (99.99%, Alfa Aesar) were accurately weighed according to the predetermined composition listed in **Table S2** and sealed in quartz tubes under vacuum ( $\sim 10^{-3}$  torr). The quartz tubes were slowly heated to 1323 K, held at this temperature for 2 hours to ensure homogenization, and rapidly quenched in water. After pretreatment, the quartz tubes were heated to 1273 K at a controlled rate of 1.5 K min<sup>-1</sup>, held for 6 hours to facilitate heating of the homogeneous quartz tubes, and cooled to room temperature at the same rate.

### Room temperature compression

To evaluate the mechanical properties of the specimens, compression examinations were conducted at room temperature ( $296 \pm 2$  K) under ambient. In this examination, the specimens possessing a pillar structure (about 5 mm  $\times$  5 mm  $\times$  10 mm) were subjected to a compressive stress along the long-side of the specimen (i.e., stress was parallel to the 10 mm side) using a universal testing machine (AG-Xplus 50kN, Shimadzu). To ensure a stable compression process, a small pre-stress was applied prior to the commencement of compression test. The compression was terminated until the failure of the specimens with an initial compressive strain rate of 0.05 mm min<sup>-1</sup>. This examination is denoted as “RT Stress-Strain (*S-S*) measurement” and the obtained curve is suggested as *S-S* curve in the following sections unless otherwise mentioned.

### Stress-Temperature (*S-T*) measurement

Besides to the aforementioned RT compression examinations, to evaluate the mechanical properties of the specimens under phase transformation, the specimens were scanned in a specific temperature range including the phase transformation temperature under a constant compressive stress of 2 MPa using a universal testing machine (AG-Xplus 50kN, Shimadzu). This examination is denoted as “Stress-Temperature ( $S$ - $T$ ) measurement” and the obtained curve is suggested as  $S$ - $T$  curve unless otherwise mentioned.

Temperature was controlled using a temperature controller (SSR-PG TC K, Sakaguchi) and the heating process was manipulated from RT to  $\sim 423$  K with a heating rate of  $5 \text{ K min}^{-1}$  followed by an air-cooling process to RT. During the heating process, to avoid the oxidation of the specimens, a high purity  $\text{N}_2$  atmosphere (purity 99.99%) was dynamically flowed into the chamber of furnace. To accurately record the temperature of the specimens, they were placed on the center of stage of the testing machine equipped with a thermocouple, which was very close to the specimens.

Prior to the commencement of the  $S$ - $T$  measurement, a small pre-stress was introduced to the specimens to obtain a stable compression process. Additionally, to rule out any displacement brought about from the thermal expansion of the system, instead of reading the cross-head of the universal testing machine, the displacement of the specimens was recorded using an *in-situ* high-resolution camera system during the temperature scanning under a 2 MPa compressive stress. Lastly, the collected data (i.e., temperature read by a thermal couple and the strain read by a high-resolution camera system) was analyzed using DIPP-Motion V2D software.

## **TE properties Measurement**

The solidified alloys were then cut and ground into specific shapes: columns  $4 \text{ mm} \times 4.3 \text{ mm} \times 12 \text{ mm}$  and pellets with 6 mm diameter and 2 mm thickness. These samples were further ground on # 4000 SiC paper (Buehler) in preparation for thermoelectric measurements. The electrical resistivity  $\rho$  and Seebeck coefficient  $S$  were measured by a commercial instrument

(ZEM-3, ULVAC) under the helium-filled atmosphere. In the thermal properties, the thermal conductivity  $\kappa$  comprised three factors according to the equation  $\kappa = D \times C_p \times d$ . The thermal diffusivity  $D$  was measured by a commercial instrument (LFA-467, Netzsch), the specific heat capacity  $C_p$  was measured by DSC (DSC 3500 Sirius, Nertzch), while the density  $d$  was obtained by Archimedes' method (JA-2003J, Chrom Tech), respectively. The DSC samples of Ag<sub>2</sub>Se-based alloy (50 mg) were carefully loaded into crucibles. The samples were then subjected to a heating process, gradually reaching a temperature of 470 K, followed by a controlled cooling phase down to 303 K, with a heating/cooling rate of 10 K min<sup>-1</sup>, all within a nitrogen-filled atmosphere. The lattice thermal conductivity could be estimated by  $\kappa_L = \kappa - \kappa_e$ , where the electronic thermal conductivity  $\kappa_e$  was calculated using the Wiedemann-Franz law  $\kappa_e = LT\rho^{-1}$ . Note that the Lorentz factor  $L$  correlates with the  $S$  via the equation  $L = \left\{ 1.5 + \exp\left[-\frac{|S|}{116}\right] \right\} \times 10^{-8} V^2 K^{-2}$ .<sup>[20]</sup> The carrier concentration ( $n_H$ ) and mobility ( $\mu_H$ ) were obtained by Hall measurement (ECOPIA, HMS-3000) under the magnetic field of 0.49T.

## Characterization

Mechanical grinding and polishing were applied on the Ag<sub>2</sub>Se-based alloy, using SiC paper (#400 to #4000) and Al<sub>2</sub>O<sub>3</sub> powder with particle sizes of 1.0  $\mu\text{m}$  and 0.05  $\mu\text{m}$ , respectively, and were followed by further metallographic observation and compositional analysis (JEOL JXA-8530F). The Ag<sub>2</sub>Se-based alloys were crushed into powder, sieved through 500 mesh, and placed into the capillaries. The in-situ synchrotron-radiation powder X-ray analysis at the TPS-19A beamline of the National Synchrotron Radiation Research Center (NSRRC, Taiwan), with the wavelength of 0.61992 Å. The microstructure of the Ag<sub>2</sub>Se and SeAg<sub>2</sub>Se were analyzed using field-emission transmission electron microscopy (FETEM, Talos F200X G2) at an accelerating voltage of 200 kV. Sample preparation for this analysis utilized a focused ion beam (FIB, Hitachi NX2000) with a Ga<sup>+</sup> ion source.

## TE conversion efficiency and Z-meter measurement:

TEG (Mini-PEM): The  $\text{Ag}_2\text{Se}$ -based samples were shaped into rectangular dimensions of 4.0 mm (depth)  $\times$  4.3 mm (width)  $\times$  12.0 mm (height). Copper wires with a diameter of 0.45 mm were used as conducting leads. During assembly, one type of solder paste, Sn-Bi solder (138°C, Shenmao), was utilized. First, the copper wires were soldered to the electrodes using Sn-3Ag-0.5Cu (491 K, SAC). Next, the electrodes were connected to the single-leg thermoelectric device using SAC solder wire. The assembled single-leg device was then placed into a commercial instrument (Mini-PEM, ULVAC). To minimize thermal contact resistance between the copper blocks and electrodes, a 200  $\mu\text{m}$  thick graphite sheet (Grafoil) was applied to the hot and cold sides with thermal grease (KS-613, Shin-Etsu Silicone).

TEC (Z-meter): Using a high-performance  $\text{Ag}_2\text{Se}$  alloy for the  $n$ -type material, a thermoelectric pellet was fabricated to estimate the cooling performance. First, the nickel wires were joined to the measuring holder using Sn-Bi solder (411 K, Shenmao). The  $\text{Ag}_2\text{Se}$  alloy was shaped into a  $2 \times 3 \times 4 \text{ mm}^3$  pellet, which was then printed with liquid-metal layers to serve as conductors for two nickel wires. The assembled holder was then placed into a commercial instrument (DX4091, TEC Microsystems). The obtained result of  $\Delta T_{\text{max}}$  of the thermoelectric pellet was shown in Figure S5.

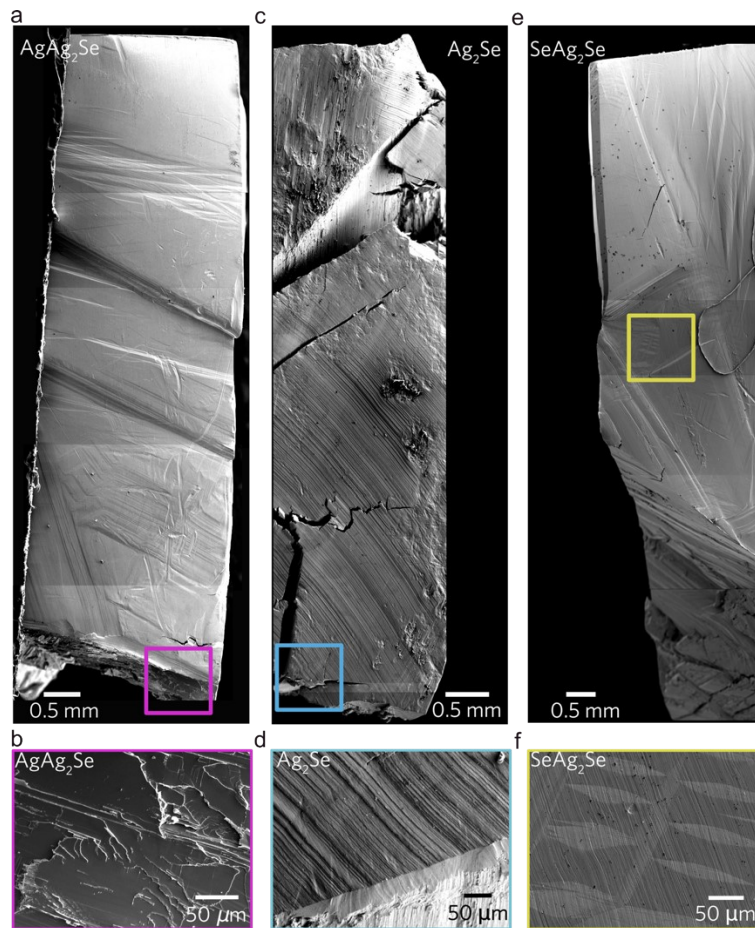

**Figure S1.** The cross-sectional SEM images of the (a,b)  $\text{AgAg}_2\text{Se}$ , (c,d)  $\text{Ag}_2\text{Se}$ , and (e,f)  $\text{SeAg}_2\text{Se}$  specimens.

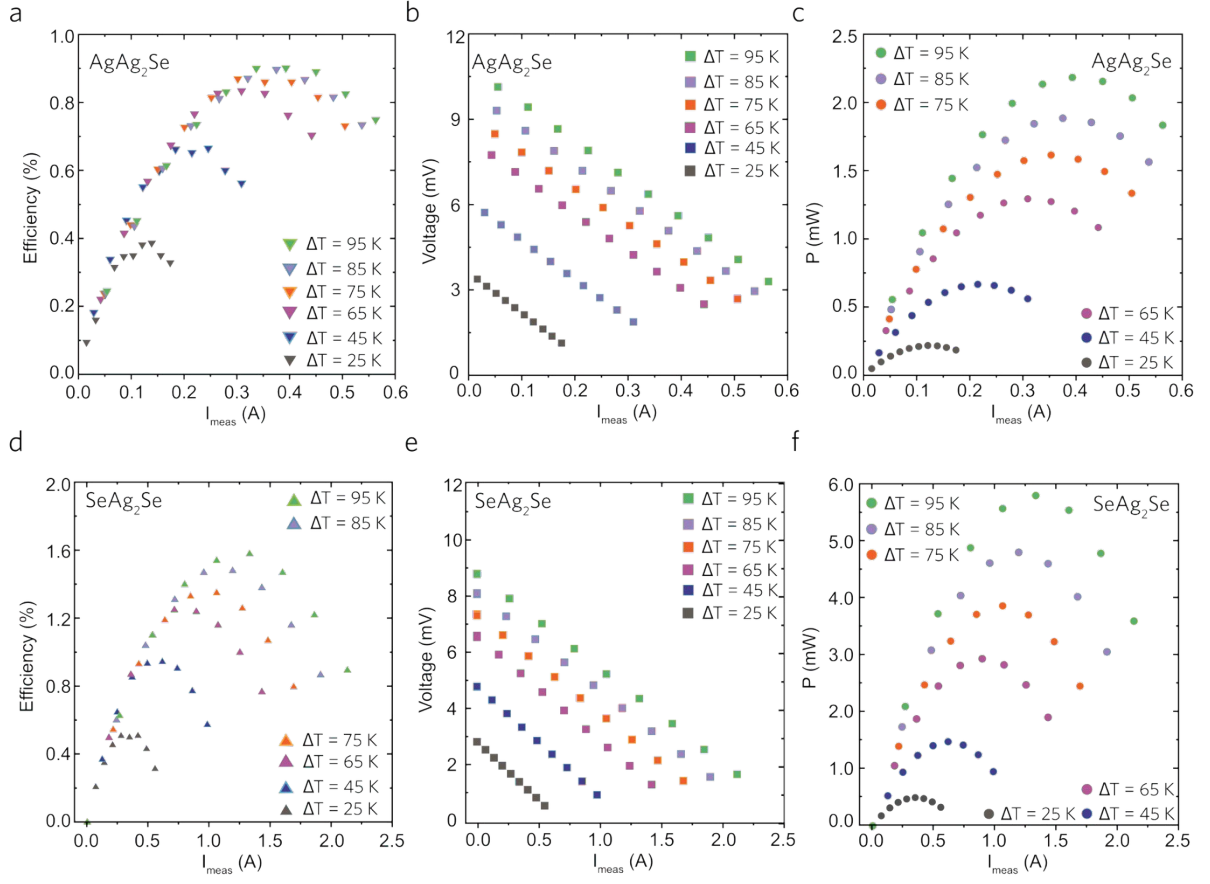

**Figure S2.** The single-leg mini-PEM measurement result includes a, d) conversion efficiency  $\eta$ . b, e) terminal voltage  $V$ . c, f) output power  $P_{\text{out}}$  with the current of the single legs of  $\text{AgAg}_2\text{Se}$ ,  $\text{Ag}_2\text{Se}$ , and  $\text{SeAg}_2\text{Se}$  alloy as a function of temperature gradient  $\Delta T$ .

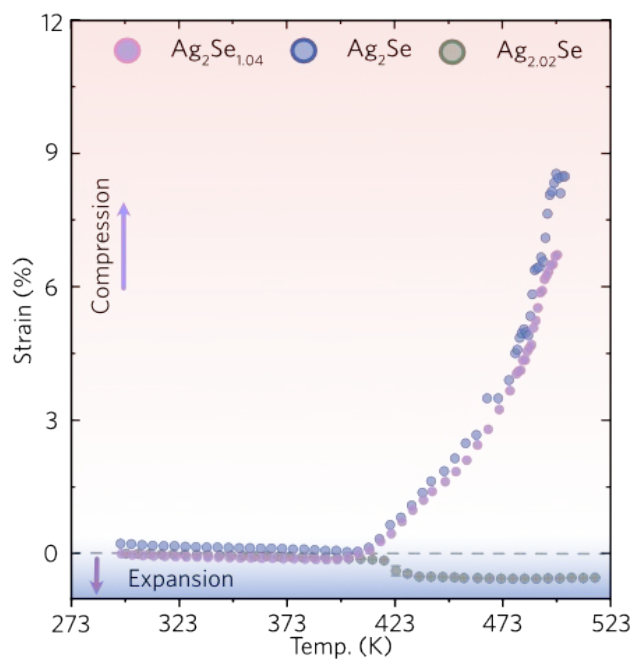

**Figure S3** Temperature-dependent strain curves of  $\text{Ag}_2\text{Se}$ , Se-rich  $\text{Ag}_2\text{Se}_{1.04}$ , and Ag-rich  $\text{Ag}_{2.02}\text{Se}$  recorded heating up from room temperature RT to 500 K.

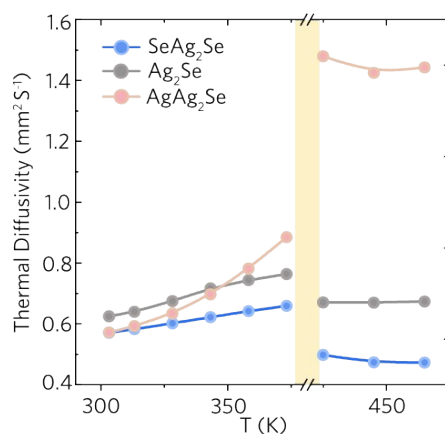

**Figure S4** Temperature dependence of the thermal diffusivity.

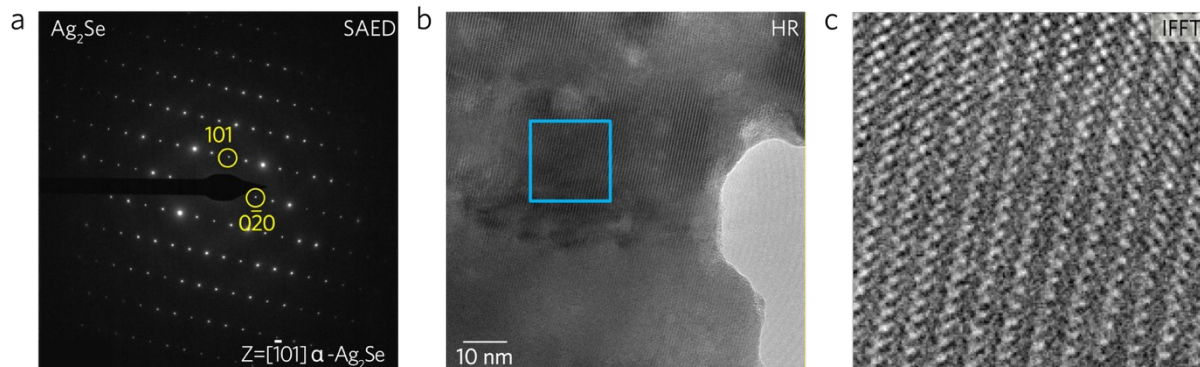

**Figure S5** (a–c) Lattice-resolved HRTEM image of  $\text{Ag}_2\text{Se}$  with corresponding SAED pattern along the  $[101]$  zone axis and IFFT reconstruction.

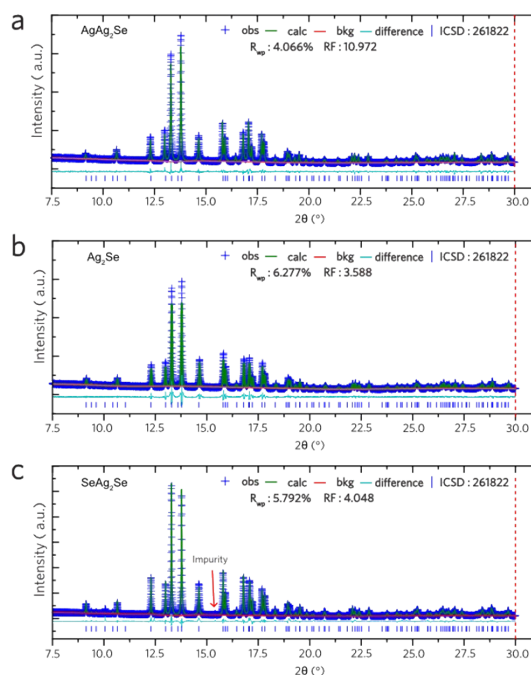

**Figure S6** (a, b) Powder XRD patterns of  $\text{AgAg}_2\text{Se}$ ,  $\text{Ag}_2\text{Se}$ , and  $\text{SeAg}_2\text{Se}$  at room temperature (synchrotron radiation source: TPS-19A).

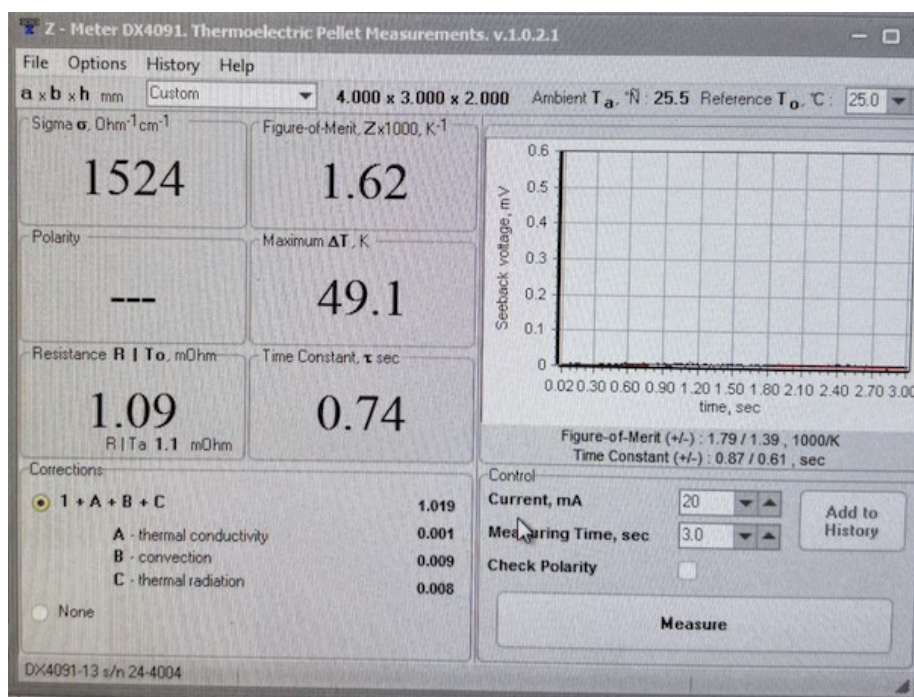

**Figure S7** The thermoelectric cooling performance of the as-fabricated thermoelectric pellet.



**Table S1.** Thermal and electrical transport properties of Ag-Se based alloys at room temperature.

| Sample               | $\sigma$<br>[S*cm] | $S$<br>[ $\mu$ VK <sup>-1</sup> ] | $\kappa$<br>[Wm <sup>-1</sup> K <sup>-1</sup> ] | $zT_{\text{peak}}$ | $\mu_{\text{H}}$<br>[cm <sup>2</sup> V <sup>-1</sup> s <sup>-1</sup> ] | $n_{\text{H}}$<br>[10 <sup>18</sup> cm <sup>-3</sup> ] |
|----------------------|--------------------|-----------------------------------|-------------------------------------------------|--------------------|------------------------------------------------------------------------|--------------------------------------------------------|
| SeAg <sub>2</sub> Se | 1501               | -139                              | 1.34                                            | 0.84               | 1988±14                                                                | -3.57±0.03                                             |
| Ag <sub>2</sub> Se   | 2932               | -89.8                             | 1.58                                            | 0.58               | 2050±32                                                                | -4.34±0.06                                             |
| AgAg <sub>2</sub> Se | 3322               | -88.4                             | 1.92                                            | 0.53               | 1895±56                                                                | -4.87±0.10                                             |

**Table S2.** The nominal composition of Ag<sub>2</sub>Se-based samples.

| Sample               | Ag (at%) | Se (at%) |
|----------------------|----------|----------|
| SeAg <sub>2</sub> Se | 65.79    | 34.21    |
| Ag <sub>2</sub> Se   | 66.66    | 33.34    |
| AgAg <sub>2</sub> Se | 66.89    | 33.11    |

**Table S3.** The lattice parameters of Ag-Se based alloys by Rietveld refinement.

| Sample               | $a$ (Å) | $b$ (Å) | $c$ (Å) |
|----------------------|---------|---------|---------|
| SeAg <sub>2</sub> Se | 4.33290 | 7.07333 | 7.78654 |
| Ag <sub>2</sub> Se   | 4.33518 | 7.06906 | 7.77369 |
| AgAg <sub>2</sub> Se | 4.33589 | 7.06756 | 7.76896 |

**Table S4.** EPMA analysis for the SeAg<sub>2</sub>Se sample.

| Sample               | Region | Ag (at%)   | Se (at%)   | wt (%)     |
|----------------------|--------|------------|------------|------------|
| SeAg <sub>2</sub> Se | Light  | 64.94±0.32 | 35.06±0.32 | 99.91±0.53 |
|                      | Dark   | 64.70±0.38 | 35.30±0.38 | 99.74±0.14 |
